# Supplementary material
Source: publisher figshare collection journal article supplement (https://acs.figshare.com/ndownloader/files/5458589)
Supplement: Supplementary file 1 [file 5458589]

## Supporting Information

### Nonspecific Organelle-Targeting Strategy with Core-Shell Nanoparticles of Varied Lipid Components/Ratios

Lu Zhang,<sup>a</sup> Jiashu Sun,<sup>b\*</sup> Yilian Wang,<sup>c</sup> Jiancheng Wang,<sup>c</sup> Xinghua Shi,<sup>b</sup> Guoqing Hu<sup>d</sup>

<sup>a</sup> Department of Chemistry, Capital Normal University, Beijing 100048, China

<sup>b</sup> CAS Key Laboratory for Biological Effects of Nanomaterials and Nanosafety, CAS Center for Excellence in Nanoscience, National Center for Nanoscience and Technology, Beijing 100190, China

<sup>c</sup> State Key Laboratory of Natural and Biomimetic Drugs, School of Pharmaceutical Sciences, Peking University, Beijing 100191, China

<sup>d</sup> State Key Laboratory of Nonlinear Mechanics, Institute of Mechanics, Chinese Academy of Sciences, Beijing 100190, China

#### Contents

**S-2, Table S1.** Molar ratio of varied components in lipid solution for preparation of hybrid nanoparticles within the microfluidic chip.

**S-3, Figure S1.** CAD draw of the two-stage microfluidic chip for generating lipid-polymer nanoparticles with different lipid components/ratios. Scale bar, 5 mm.

**S-4, Figure S2.** Cellular uptake of hybrid nanoparticles with different concentrations. HUVEC cells are incubated with nanoparticles suspension containing 12.5, 25 or 50  $\mu\text{g/mL}$  PLGA for 24 h, and observed with laser scanning confocal microscope.

**S-5, Figure S3.** Scatter plots generated by a plugin of ImageJ (co-localization finder) from confocal images of (A) 60 % DOTAP and (B) 10 % DOTAP, and (i) Mitotracker-labeled mitochondria and (ii) LysoTracker-labeled lysosomes. The dots on the diagonals represent the best correlation between hybrid nanoparticles and mitochondria/lysosomes.

**S-6, Figure S4.** HUVEC cells incubated with hybrid nanoparticles with 0 % DOTAP and 80 % DOPE. (A) The green fluorescence comes from the stained mitochondria. (B) The red fluorescence comes from DiD-labeled NPs. (C) The composite image by overlaying the images of the green fluorescence, the red fluorescence and the bright field. Scale bar, 5  $\mu\text{m}$ .

**Table S1. Molar ratio of varied components in lipid solution for preparation of hybrid nanoparticles within the microfluidic chip.**

| # | DOTAP (%) | DOPE (%) | DPPC (%) | Cholesterol (%) | DSPE-PEG (%) |
|---|-----------|----------|----------|-----------------|--------------|
| 1 | 60        | 20       | 0        | 16              | 4            |
| 2 | 40        | 40       | 0        | 16              | 4            |
| 3 | 20        | 60       | 0        | 16              | 4            |
| 4 | 10        | 70       | 0        | 16              | 4            |
| 5 | 60        | 0        | 20       | 16              | 4            |
| 6 | 80        | 0        | 0        | 16              | 4            |
| 7 | 0         | 80       | 0        | 16              | 4            |

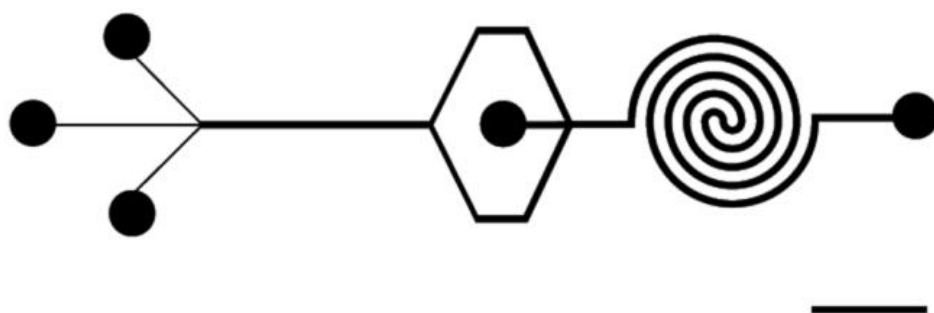

Figure S1. CAD draw of the two-stage microfluidic chip for generating lipid-polymer nanoparticles with different lipid components/ratios. Scale bar, 5 mm.

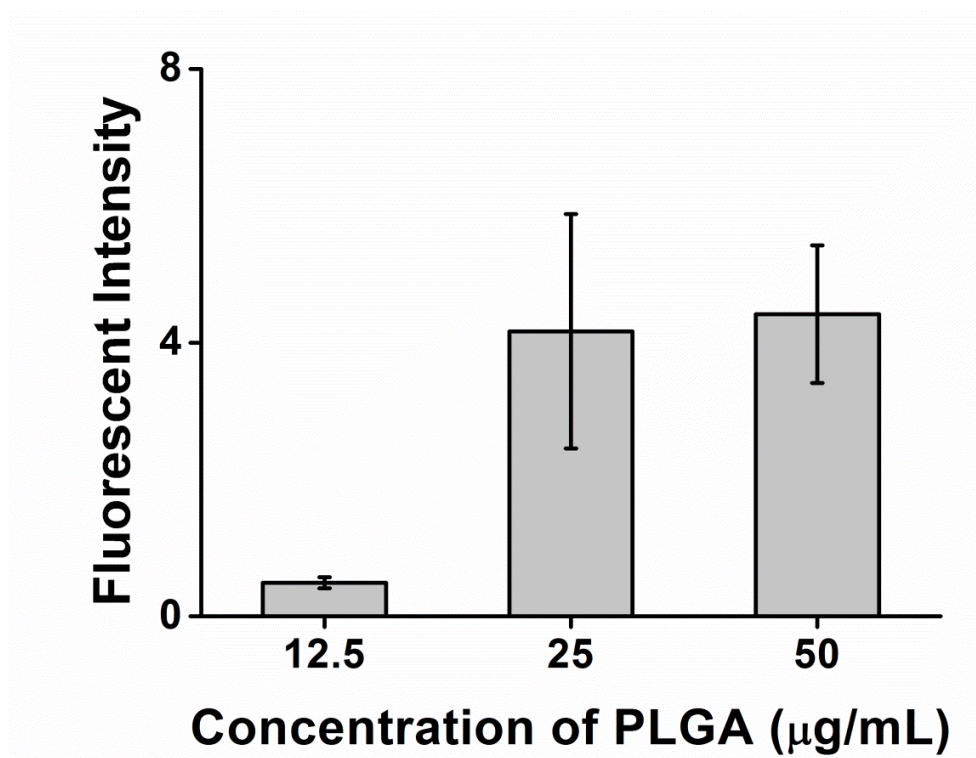

Figure S2. Cellular uptake of hybrid nanoparticles with different concentrations. HUVEC cells are incubated with nanoparticles suspension containing 12.5, 25 or 50  $\mu\text{g/mL}$  PLGA for 24 h, and observed with laser scanning confocal microscope.

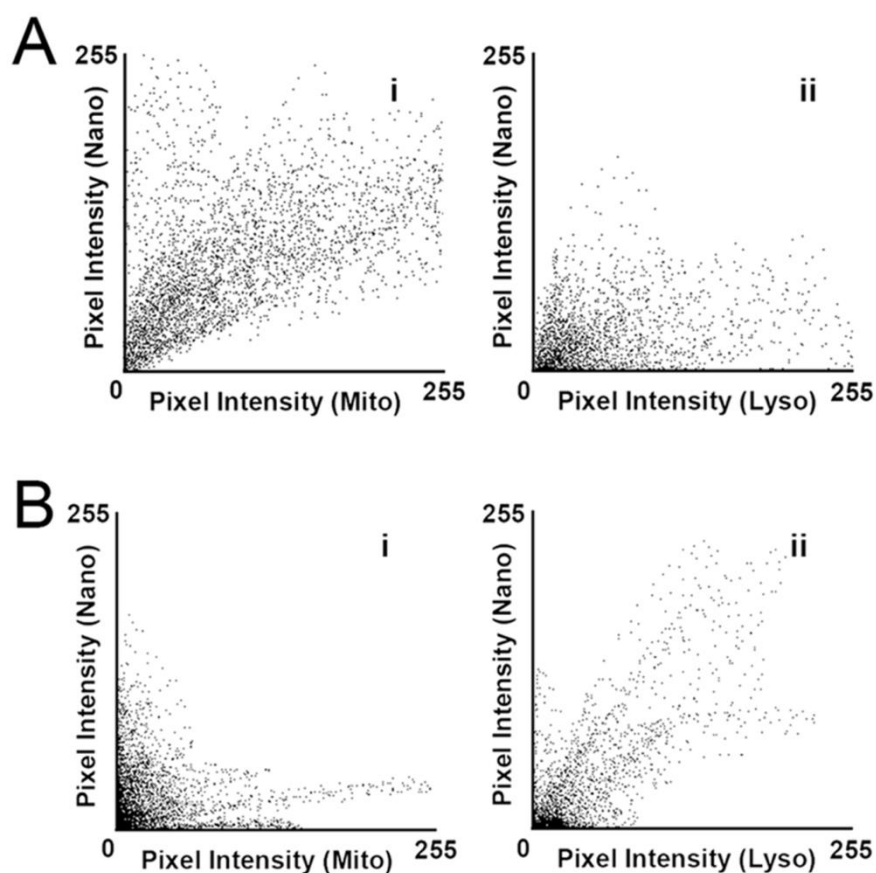

Figure S3. Scatter plots generated by a plugin of ImageJ (co-localization finder) from confocal images of (A) 60 % DOTAP and (B) 10 % DOTAP, and (i) Mitotracker-labeled mitochondria and (ii) LysoTracker-labeled lysosomes. The dots on the diagonals represent the best correlation between hybrid nanoparticles and mitochondria/lysosomes.

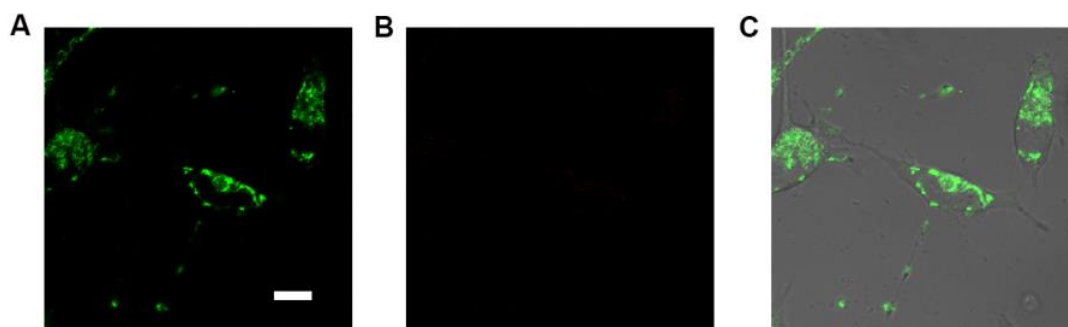

Figure S4. HUVEC cells incubated with hybrid nanoparticles with 0 % DOTAP and 80 % DOPE. (A) The green fluorescence comes from the stained mitochondria. (B) The red fluorescence comes from DiD-labeled NPs. (C) The composite image by overlaying the images of the green fluorescence, the red fluorescence and the bright field. Scale bar, 5  $\mu$ m.
